# Supplementary material
Source: HighWire-hosted journal article supplement (http://www.cfp.ca/highwire/filestream/30247/field_highwire_adjunct_files/0/Explications_de_la_fiche_de_controle_des_soins_preventifs.pdf)

**Education/Counselling**

Comportement

**Acide folique (A) :**

- Prévenir les malformations du tube neural (MTN) chez toutes les femmes susceptibles de devenir enceintes
- Femmes à faible risque : supplément d'acide folique de 0,4 à 0,8 mg par jour à prendre au moins un mois avant et trois mois après la conception.
- Femmes à haut risque (grossesse précédente avec MTN) : un supplément de 4 mg d'acide folique par jour pendant 3 mois avant et 3 mois après la conception réduit le risque de récurrence.

*Mauvaises habitudes alimentaires (B) :*

- Prévention de la coronaropathie, cancer du côlon
- Offrir des conseils diététiques généraux : diminuer les graisses, augmenter les fibres.
- Pour les personnes à risque accru, considérer orienter vers une nutritionniste clinique ou autre professionnel possédant une expertise spécialisée en nutrition.

*Conseils diététiques sur les gras/le cholestérol (B) :*

- Prévient la coronaropathie
- Preuves applicables seulement aux HOMMES de 30 à 69 ans.
- Réduire l'ingestion de graisses totales, des graisses saturées et du cholestérol

*Calcium 1000-1500mg/jour<sup>1</sup> :*

- Prévient l'ostéoporose
- La Société de l'ostéoporose du Canada (SOC) recommande aux adultes de prendre 1000 à 1500 mg de calcium élémentaire/jour.
- Lorsque l'alimentation seule ne procure pas cette quantité (pour la plupart des gens, trois ou quatre portions de produits laitiers), on recommande alors un supplément de calcium.<sup>2</sup>

*Vitamine D<sup>1</sup> :*

- Prévient l'ostéoporose
- La SOC recommande 200 UI/jour chez les 50-64 ans
- 400-800 UI/jour chez les personnes de ≥ 65 ans ou avec ostéoporose

*Activité physique modérée (B) :*

- Prévention de la maladie cardiovasculaire et de l'hypertension.
- L'activité physique peut également contribuer à la prévention de l'obésité, du diabète de type 2 et de l'ostéoporose.
- Recommander un niveau modéré d'activité physique pratiquée de façon constante qui permet d'accumuler 30 minutes ou plus par jour pour la plupart des journées de la semaine.
- Parmi les activités physiques d'intensité modérée, notons : marche normale, golf à pied, bicyclette lente, ramasser les feuilles, nettoyer les fenêtres, danser lentement, travaux légers de restauration.
- Note : Pratiquer une activité physique modérée est une recommandation de catégorie B, alors que le counselling médical est une recommandation de catégorie C.

*Éviter l'exposition au soleil, utiliser des vêtements de protection (B)*

- Prévient le cancer de la peau
- Preuves fournies par des études épidémiologiques centrées sur l'étiologie du mélanome, la prudence et le faible coût/effets indésirables, qui confirment d'éviter l'exposition solaire excessive en milieu de journée, plus l'utilisation de vêtements protecteurs.
- L'utilisation des écrans solaires par la population générale est une recommandation de catégorie C (dernière mise à jour : 1994).

*Pratiques sexuelles sans risque/counselling sur les ITS (en particulier le counselling sur la gonorrhée) (B) :*

- Prévient la transmission des infections transmissibles sexuellement.
- L'abstinence est le moyen le plus efficace; preuves passables concernant l'utilisation du condom.

Counselling sur le tabagisme • Pour prévenir les maladies tabagiques

- **Cessation du tabagisme (A) :** le counselling efficace pour réduire la proportion des fumeurs.
- **Substitution de nicotine (A) :** on peut l'offrir comme traitement d'appoint pour cesser de fumer. Augmente les taux de cessation.
- *Fruits et légumes verts feuillus pour les fumeurs :* pour réduire le risque de cancer du poumon, manger une moyenne de sept portions de légumes verts feuillus par semaine.
- *Orienter vers un programme validé de cessation du tabagisme :* la référence par un médecin améliore la participation aux programmes de groupe.

Counselling sur l'alcool

- Prévient la morbidité reliée à l'alcool
- *Identification des consommateurs abusifs (B) :* Questionnaires standardisés (p. ex. CAGE, AUDIT) et/ou questionner le patient.
- *Counselling pour l'abus d'alcool (B) :* Clarifier l'association entre la consommation d'alcool et les conséquences reliées à l'alcool, conseils pour réduire la consommation.

Personnes âgées

- **Évaluation des habiletés cognitives (A et B) :**
- Lorsque les soignants ou les informateurs décrivent un déclin cognitif chez un individu, ces observations doivent être prises très au sérieux; il est indiqué de procéder à une évaluation des fonctions cognitives et d'assurer un suivi minutieux (A).
- Les plaintes d'un soignant ou d'un patient concernant la mémoire devraient être évaluées et faire l'objet d'un suivi pour en apprécier la progression (B).
- **Évaluation des chutes (A):**
- Preuves de bonne qualité pour procéder, suite à une chute, à une évaluation multidisciplinaire des patients âgés qui ont des antécédents de chutes ou de les référer, suite à une chute, à une équipe multidisciplinaire d'évaluation des chutes, là où un tel service est disponible (A).
- Les preuves sont insuffisantes pour recommander d'inclure, dans l'examen périodique des personnes âgées, l'évaluation et le counselling auprès des patients âgés pour le risque de chutes (C).

**Veuillez prendre note:**

**Caractères gras** = Preuves de bonne qualité

*Italique* = Preuves passables (selon le Groupe d'étude canadien sur les soins de santé préventifs)

Texte régulier = lignes directrices d'autres sources canadiennes

(Voir texte encadré pour explications)

Endossé par:

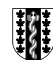

The College of  
Family Physicians  
of Canada

Le Collège des  
médecins de famille  
du Canada

## Education/Counselling

**Hygiène bucco-dentaire** • Pour prévenir la parodontolyse et le cancer de la bouche

- **Brossage des dents/soie dentaire (A, B)** : La soie dentaire est efficace pour prévenir la gingivite chez les adultes. Le brossage des dents est essentiel pour l'application du dentifrice au fluorure pour prévenir les caries dentaires (A) et prévenir la gingivite (B).
- **Fluorure (dentifrice/supplément) (A)** : l'application quotidienne d'un dentifrice au fluorure réduit de façon significative les caries et/ou les suppléments quotidiens de fluorure (seulement dans les régions où le taux de fluorure est sous-optimal).
- **Détartrage des dents et prophylaxie (B)** : Chez les patients dont la parodontie est saine, la prophylaxie et l'hygiène buccale professionnelle intensive prévient la gingivite chronique et la parodontite. Le détartrage annuel n'apporte aucun avantage additionnel pour ceux qui maintiennent une bonne hygiène buccale.
- **Cessation du tabagisme (A, B)** : Pour réduire le risque de cancer de la bouche. Les programmes d'intervention ont réduit l'incidence des lésions précancéreuses. Préviennent également la parodontolyse causée par le tabagisme (B).

**Sécurité personnelle**

- **Ceintures de sécurité (B)** : Préviennent les blessures causées par les accidents de véhicules automobiles. Les médecins peuvent contribuer à une amélioration significative à court terme pour augmenter le taux d'utilisation des ceintures.
- **Programmes de contrôle anti-bruit/protection de l'ouïe (A)** : Il existe des preuves de bonne qualité à l'appui des programmes de contrôle anti-bruit et de protection de l'ouïe; aucun commentaire toutefois sur l'impact du counselling dispensé par le médecin.

**Parents ayant des enfants < 15 ans**

- **Contrôle des poisons/ipéca (B)** : Counselling sur la prévention des intoxications et la distribution aux parents de jeunes enfants d'ipéca et de collants avec les numéros de téléphone des centres antipoisons.
- **Détecteurs de fumée, vêtements de nuit ininflammables et réglage du thermostat pour l'eau chaude (B)** : Le counselling peut accroître le nombre des mesures de sécurité dans la maison mais on ne connaît pas son impact sur les blessures.

## Examen physique

**Tension artérielle (B)** : Dépistage de l'hypertension.

- Si la TA est légèrement élevée, faites 3 autres lectures sur une période de 6 mois.
- Si la TA est très élevée, rapprochez les intervalles entre lectures.
- Chez les adultes, le traitement de l'hypertension réduit le risque d'accident vasculaire cérébral, d'incidents cardiaques et de décès (recommandation de catégorie A).

**IMC (Indice de masse corporelle)** :

- Recommandation de catégorie B pour les adultes obèses atteints d'une pathologie liée à l'obésité.
- Recommandation de catégorie C pour la population générale adulte.

**Dépistage de la surdité chez les personnes âgées (B)** :

- Tous les tests suivants ont une grande sensibilité pour détecter une surdité
- **Test de la voix chuchotée**: voix chuchotée en dehors du champ de vision
- **Audioscope**

- **Information**: Une seule question pour s'informer des troubles auditifs

**Échelle de vision de Snellen (B)** :

- Chez les personnes âgées, détecte de façon fiable une baisse de l'acuité visuelle.

**Seins (A)** : • Dépistage du cancer du sein.

- Dépister les femmes âgées de 50 à 69 ans par l'examen clinique et la mammographie; à tous les 1 à 2 ans.
- Voir la section investigations/laboratoire pour des explications sur la mammographie.

**Test de Pap (B)** : • Dépister le carcinome du col invasif.

- Dépistage annuel à partir du début des activités sexuelles ou à l'âge de 18 ans (sic)
- Après 2 cytologies normales, dépister aux 3 ans jusqu'à l'âge de 69 ans.
- Augmenter la fréquence chez les femmes ayant des facteurs de risque : âge de la première relation sexuelle < 18 ans, nombreux partenaires sexuels ou conjoint qui a de nombreux partenaires, tabagisme ou statut socio-économique inférieur.

**Veuillez prendre note:**

**Caractères gras** = Preuves de bonne qualité  
*Italique* = Preuves passables (selon le Groupe d'étude canadien sur les soins de santé préventives)  
 Texte régulier = lignes directrices d'autres sources canadiennes  
 (Voir texte encadré pour explications)

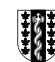

The College of  
Family Physicians  
of Canada

Le Collège des  
médecins de famille  
du Canada

Endossé par:

## Immunisations

**Tétanos (A) :**

- Doses routinières de rappel aux 10 ans après une série primaire complète
- Les adultes sans série primaire ont besoin de 3 doses.
- Chez les adultes, la série primaire s'administre en trois temps : 0, 1-2 mois, et 6-12 mois.<sup>4</sup>

**Rubéole (B) :** Selon le CCNI<sup>4</sup>:

- Administrer une dose du vaccin aux femmes en âge de procréer mais non enceintes à moins de disposer d'une preuve d'immunité par vaccination ou par test sérologique.
- Le test sérologique n'est pas recommandé car il peut retarder une vaccination nécessaire.<sup>5</sup>
- Selon le Groupe de travail, la décision d'une vaccination ou d'un dépistage universel pour connaître l'état immunitaire et de vacciner par la suite dépend du contexte de pratique du médecin (c.-à-d. coût de la sérologie, la patiente reviendra-t-elle pour son vaccin nécessaire).<sup>1</sup>

**Varicelle (B) :**

- Déterminer le statut immunitaire contre la varicelle par l'anamnèse ou la sérologie.
- Administrer aux personnes vulnérables à la varicelle, notamment : les femmes en âge de procréer (mais pas pendant la grossesse), les travailleurs de la santé, les personnes vivant sous le même toit que des individus immunodéprimés, les adultes à risque d'être exposés au travail (enseignants, travailleurs dans les garderies), et les autres adultes susceptibles, en particulier les nouveaux immigrants en provenance de pays tropicaux.
- Administrer deux doses à au moins 4 semaines d'intervalle, si  $\geq 13$  ans.<sup>5</sup>

**Vaccin contre le pneumocoque (A) <sup>4</sup>:**

- A toutes les personnes  $\geq 65$  ans
- Personnes à haut risque : toutes les personnes  $> 5$  ans atteintes des affections suivantes : drépanocytose, asplénie, dysfonction splénique, maladie respiratoire chronique (sauf l'asthme), cirrhose, alcoolisme, néphropathie chronique, syndrome néphrotique, diabète, fuite chronique de LCR, infection par le VIH, fumeurs et autres affections associées à une immunodépression (maladie de Hodgkin, lymphome, myélome multiple, immunosuppression induite en vue d'une transplantation d'organe).

**Vaccin contre l'influenza (A) <sup>4</sup>:**

- Vacciner annuellement les personnes suivantes :
- tous les adultes
- $\geq 65$  ans
- Les adultes et les enfants atteints de troubles cardiaques ou pulmonaires chroniques (y compris la dysplasie broncho-pulmonaire, la fibrose kystique et l'asthme) suffisamment sévères au point de nécessiter un suivi régulier et des soins hospitaliers,
- Les adultes et les enfants atteints de maladies chroniques, p. ex. diabète, maladies métaboliques, cancer, immunodéficience, immunosuppression, néphropathie, anémie et hémoglobinopathie,
- Les personnes à risque élevé des complications de l'influenza qui voyagent dans des régions où le virus est probablement présent,
- Les travailleurs de la santé et les autres personnels en contact étroit avec des individus appartenant à des groupes déjà décrits comme étant à risque élevé
- Les contacts vivant sous le même toit (y compris les enfants) qu'une personne à risque élevé qui ne peuvent être immunisés ou qui peuvent réagir de façon inappropriée à l'immunisation.

Vaccin acellulaire contre la coqueluche<sup>4</sup>

Vaccin contre le virus du papillome humain<sup>4</sup>

- 3 doses
- 9-26 ans

**Veillez prendre note:**

**Caractères gras** = Preuves de bonne qualité

*Italique* = Preuves passables (selon le Groupe d'étude canadien sur les soins de santé préventives)

Texte régulier = lignes directrices d'autres sources canadiennes

(Voir texte encadré pour explications)

Endossé par:

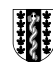

The College of  
Family Physicians  
of Canada

Le Collège des  
médecins de famille  
du Canada

**Investigations/Laboratoire**

**Mammographie et examen clinique du sein (A) :**

- Dépister les femmes âgées de 50 à 69 ans aux 1-2 ans pour rechercher un cancer du sein.
- Recommandation de catégorie C pour les femmes à risque moyen et âgées de 40 à 49 ans.
- Dépistage plus fréquent peut être requis (aux 12-18 mois) dans le groupe des 40-49 ans.
- Lorsqu'elles atteignent l'âge de 40 ans, on devrait informer les femmes des avantages et des risques potentiels de la mammographie de dépistage afin qu'elles décident à quel âge elles souhaitent débiter le dépistage.

Dépistage du cancer colorectal chez les patients ≥ 50 ans :

- **Hémoculte multiphasique aux 1 à 2 ans (A)** OU
- *Sigmoïdoscopie flexible (B)* (Fréquence non déterminée)
- Coloscopie

*Cytologie cervicale (B)* : • Voir explication du test Pap.

Dépistage des infections transmissibles sexuellement (ITS) dans les populations à haut risque :

- Populations à risque élevé : individus de moins de 30 ans ayant eu au moins 2 partenaires sexuels au cours de la dernière année ou âgés de 16 ans lors de leur première relation sexuelle, prostituées, contacts sexuels d'individus connus porteurs d'une ITS.
- **Syphilis (A)** : Test sérologique
- **Gonorrhée (A)** : Dépistage avec coloration de Gram et culture d'un prélèvement cervical ou urétral; tests urinaires.
- *Chlamydia (B)*: Dépistage par culture ou amplification en chaîne par polymérase (ACP) pour tous les sites; réaction d'immunofluorescence directe (RID) pour les sites génito-urinaire (GU), conjonctival (CJ), rectal et rhino-pharyngien; titrage avec immuno-adsorbant lié à une enzyme (IAE) pour les spécimens GU ou CJ; sondes d'ADN pour les spécimens GU. Certains centres offrent des tests urinaires.
- **VIH (A)**
- **VHB**<sup>5</sup>

Densité minérale osseuse : dépister si 1 facteur de risque majeur ou 2 mineurs

Facteurs de risque majeurs : âge > 65, fracture vertébrale par compression, fracture par fragilité osseuse après l'âge de 40 ans, antécédents familiaux de fracture ostéoporotique, glucocorticoïdothérapie systémique d'une durée >3 mois, syndrome de malabsorption, hyperparathyroïdie primaire, propension aux chutes, ostéopénie visible aux rayons X, hypogonadisme, ménopause précoce (< 45 ans).

Facteurs de risque mineurs : arthrite rhumatoïde, antécédents d'hyperthyroïdie clinique, anticonvulsivothérapie chronique, faible ingestion alimentaire de calcium, tabagisme, consommation excessive d'alcool, consommation excessive de caféine, poids < 57 kg, perte de poids > 10 % du poids à l'âge de 25 ans, héparinothérapie chronique.

Lipidogramme à jeun (cholestérol total, C-HDL, triglycéride et C-LDL)<sup>3</sup>:

- Dépister tous les hommes de plus de 40 ans, et les femmes de plus de 50 ans
- Dépister les adultes ayant 2 facteurs de risque ou plus pour la coronaropathie; les patients avec preuves cliniques de coronaropathie, de maladie vasculaire périphérique ou d'athérosclérose carotidienne; les diabétiques; les patients porteurs de xanthes ou autres stigmates de dyslipidémie; et les patients ayant des antécédents familiaux de dyslipidémie ou de coronaropathie.
- La fréquence optimale du dépistage n'est pas établie. Pour les patients asymptomatiques, il semble raisonnable de dépister aux 5 ans ou plus tôt si de nouveaux facteurs de risque apparaissent.

**Valeur cible pour les lipides – selon le niveau de risque<sup>3</sup>**

| Niveau du risque                                                                   | C-LDL mmol/L | Rapport Cholestérol total : C-HDL |      |
|------------------------------------------------------------------------------------|--------------|-----------------------------------|------|
| <b>Risque élevé</b><br>(risque à 10 ans ≥20 % ou antécédents de MCV ou de diabète) | <2.0         | <b>et</b>                         | <4.0 |
| <b>Risque modéré</b><br>(risque à 10 ans : 11-19 %)                                | <3.5         | <b>et</b>                         | <5.0 |
| <b>Faible</b><br>(risque à 10 ans ≤ 10 %)                                          | <5.0         | <b>et</b>                         | <6.0 |

Glycémie à jeun<sup>4</sup> : • Dépistage du diabète de type 2

- Devrait être fait aux 3 ans chez les adultes de plus de 40 ans.
- Plus fréquemment ou plus tôt chez ceux qui présentent des facteurs de risque additionnels pour le diabète, p. ex. parent du premier degré connu diabétique, membre d'une population à haut risque (Autochtone, Hispanique, Asiatique, ascendance africaine), obésité, C-HDL ≤ 0,9 mmol/L ou TG à jeun > 2,8 mmol/L.<sup>4</sup>
- Glycémie à jeun ≥ 7,0 mmol/L est diagnostique de diabète.
- Voir lignes directrices de pratique de l'Association Canadienne Diabète pour plus de détails.<sup>4</sup>

**Références**

À moins d'avis contraire, les recommandations proviennent du Groupe d'étude canadien sur les soins de santé préventifs: Guide canadien de médecine clinique préventive. Ottawa: Ministre des Approvisionnements et Services Canada et <http://www.ctfphc.org/>

1. Comité scientifique consultatif, La Société de l'ostéoporose du Canada. Principes directeurs des activités cliniques pour la prise en charge de l'ostéoporose. JAMC 2002;167(10 suppl):S1-34.
2. Groupe de travail sur l'hypercholestérolémie et autres dyslipidémies. Recommandations pour la prise en charge et le traitement de la dyslipidémie. Can J Cardiol 2006; 22(11) 913-927.
3. Section scientifique de l'Association canadienne du diabète. Lignes directrices 2003 pour le traitement du diabète au Canada. Can J Diabetes. 2003;27 (2 Suppl)
4. Comité consultatif national sur l'immunisation. Guide canadien d'immunisation, 7e édition. Ottawa: Ministre des Travaux publics et Services gouvernementaux Canada; 2006
5. Groupe de travail d'experts sur les lignes directrices canadiennes pour les infections transmissibles sexuellement. Lignes directrices canadiennes sur les infections transmissibles sexuellement, édition 2006. Ottawa : Agence de santé publique du Canada.

**Veillez prendre note:**

**Caractères gras** = Preuves de bonne qualité  
*Italique* = Preuves passables (selon le Groupe d'étude canadien sur les soins de santé préventifs)  
 Texte régulier = lignes directrices d'autres sources canadiennes  
 (Voir texte encadré pour explications)

Endossé par:

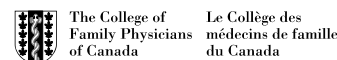

Supplement: Explications_de_la_fiche_de_controle_des_soins_preventifs.pdf [file Explications_de_la_fiche_de_controle_des_soins_preventifs.pdf]
